# Supplementary material for: Novel mutations in WWOX, RARS2, and C10orf2 genes in consanguineous Arab families with intellectual disability
Source: Springer Nature journal article supplement (doi:10.1007/s11011-016-9827-9), 2016-04-28
Supplement: MOESM1 [file 10106036]

**Supplement. Filtering process of variants found in each family:**

**Family I**

| **Filter** | **Number of variants** |
| --- | --- |
| Total | 152,436 |
| After confidence filter | 117,789 |
| After common variants filter | 18,037 |
| After predicted deleterious | 1,150 |
| After genetic analysis | 5 |
| After limiting to homozygosity intervals | 4 |

**Family II**

| **Filter** | **Number of variants** |
| --- | --- |
| Total | 119,050 |
| After confidence filter | 52,240 |
| After common variants filter | 11,235 |
| After predicted deleterious | 1,824 |
| After genetic analysis | 1 |
| After limiting to homozygosity intervals | 1 |

**Family III**

| **Filter** | **Number of variants** |
| --- | --- |
| Total | 142,528 |
| After confidence filter | 83,301 |
| After common variants filter | 15,559 |
| After predicted deleterious | 1,752 |
| After genetic analysis | 4 |
| After limiting to homozygosity intervals | 3 |
